1        **Concurrent assessment of motor unit firing properties and fascicle**  
2                    **length changes with high-density surface electromyography**  
3                                    **ultrasound-transparent electrodes**

4        Eduardo Martinez-Valdes<sup>1</sup>, \*Francesco Negro<sup>2</sup>, Alberto Botter<sup>3,4</sup>, Giacinto Luigi Cerone<sup>3,4</sup>,  
5                    Deborah Falla<sup>1</sup>, \*Patricio A Pincheira<sup>4</sup>, Glen A Lichtwark<sup>5</sup>, Andrew G Cresswell<sup>5</sup>

6  
7        <sup>1</sup> Centre of Precision Rehabilitation for Spinal Pain, School of Sport, Exercise and Rehabilitation  
8        Sciences, University of Birmingham, United Kingdom.

9        <sup>2</sup> Department of Clinical and Experimental Sciences, Università degli Studi di Brescia, Brescia,  
10        Italy.

11        <sup>3</sup> Laboratory for Engineering of the Neuromuscular System (LISiN), Department of Electronics  
12        and Telecommunication, Politecnico di Torino, Torino, Italy.

13        <sup>4</sup> PoliToBIOMed Lab, Politecnico di Torino, Turin, Italy.

14        <sup>5</sup>School of Human Movement and Nutrition Sciences, The University of Queensland, Australia

15  
16        \*Authors contributed equally

17        **Corresponding Author:**

18        Eduardo Martinez-Valdes

19        Centre of Precision Rehabilitation for Spinal Pain, School of Sport, Exercise and Rehabilitation  
20        Sciences, University of Birmingham, United Kingdom.

21        Edgbaston B15 2TT

22        e.a.martinezvaldes@bham.ac.uk

23        +44 0 121 4158187

24

25

26 **KEY POINTS**

- 27 - We used ultrasound-transparent high-density surface EMG (HDEMG-US) electrodes to  
28 examine motor unit firing properties and how this relates to changes in fascicle length, a  
29 novel method to better understand the interplay between neural activity and muscle  
30 mechanics
- 31 - For the first time, we showed that it is possible to identify multiple tibialis anterior motor  
32 units with HDEMG-US electrodes, revealing close relationships between fluctuations in  
33 discharge rate, fascicle length and dorsiflexion torque
- 34 - Delays between neural drive and muscle contraction as well as muscle shortening are  
35 reduced compared to the external torque, making this methodology more suitable for  
36 understanding motor unit recruitment strategies

37

38

39

40

41

42

43

44

45

46

47

48 **ABSTRACT**

49 Previous studies assessing relationships between muscle mechanics and neural activity have  
50 concurrently assessed changes in fascicle length (FL) and neural activation with  
51 electromyography (EMG) with low spatial sampling from different muscle regions. We used a  
52 new ultrasound-transparent high-density EMG electrode (HDEMG-US) to assess changes in FL  
53 and motor unit (MU) firing, simultaneously, on the same region of interest. EMG signals and  
54 ultrasound images were recorded simultaneously from the tibialis anterior muscle, using a silicon  
55 matrix of 32 electrodes, while performing sustained and torque-varying isometric ankle-  
56 dorsiflexion contractions, at diverse joint positions (0° and 30° plantar flexion) and torques (20%  
57 and 40% of maximum (MVC)). EMG signals were decomposed into individual MUs and changes  
58 in FL were assessed with a fascicle-tracking algorithm. MU firing data was converted into a  
59 cumulative spike train (CST) that was cross-correlated with dorsiflexion torque (CST-torque) and  
60 FL (CST-FL). On average, 7 (3) MUs were identified across contractions. Cross-correlations showed  
61 that CST could explain 60% (range: 31-85%) and 71% (range: 31-88%) of the variance in FL and  
62 torque, respectively. Cross-correlation lags revealed that the delay between CST-FL (~75ms) was  
63 considerably smaller than CST-torque (~150ms,  $p < 0.001$ ). These delays affected the  
64 interpretation of MU recruitment/de-recruitment thresholds, with FL showing consistent lengths  
65 for both recruitment and de-recruitment. This study is the first to demonstrate the feasibility of  
66 recording single-MU activity with HDEMG-US whilst simultaneously evaluating changes in FL,  
67 which provides new opportunities for more complex examinations of the interplay between  
68 fascicle dynamics and motor unit discharge rates under different contraction conditions.

69

## 70 INTRODUCTION

71 One of the most fundamental issues in motor control is to understand how the nervous system  
72 interacts with muscles for the generation and control of movement. While some answers have  
73 been obtained from separate studies in the fields of neurophysiology and biomechanics, there  
74 has been a failure to effectively integrate these two disciplines in order to provide clearer  
75 information on how neural activity is influenced by muscle mechanics and vice-versa (Enoka,  
76 2004; Tytell *et al.*, 2011). The integration of electromyography (EMG) recordings and ultrasound  
77 imaging has given important information about both the mechanisms of muscle activation and  
78 contraction, respectively (Hodges *et al.*, 2003; Brown & McGill, 2010; Barber *et al.*, 2013; Day *et*  
79 *al.*, 2013; Pincheira *et al.*, 2018). These techniques helped to determine the level of muscle  
80 activity related with a given change in fascicle length and allowed the establishment of  
81 relationships between active/passive tissue mechanics (i.e., muscle and tendon compliance) and  
82 muscle activity. However, there are many limitations to current approaches at linking muscle  
83 mechanics with neural drive to muscles. For example, numerous studies have employed  
84 amplitude estimates from bipolar surface EMG recordings in order to assess changes in neural  
85 activity and the resultant force produced by muscles (Heintz & Gutierrez-Farewik, 2007; Son *et*  
86 *al.*, 2010; Yoshitake & Shinohara, 2013; Suzuki *et al.*, 2021). Due to many factors such as crosstalk,  
87 amplitude cancellation and underlying changes in muscle length and velocity, surface EMG  
88 amplitude is unfortunately poorly correlated with the resultant force produced by muscles and  
89 therefore cannot be used to directly understand the neural determinants of muscle contractions  
90 (Negro *et al.*, 2009; Dideriksen *et al.*, 2018; Dideriksen & Farina, 2019). Furthermore, studies that  
91 have examined changes in muscle architecture directly using ultrasound (Hodges *et al.*, 2003; Day

92 *et al.*, 2013; Begovic *et al.*, 2014; Ling *et al.*, 2020) do not image from the same region as the EMG  
93 is collected (Vieira & Botter, 2021). Therefore, changes in muscle architecture and/or  
94 morphology from different regions could potentially provide results that are not related from  
95 those studied on the region of interest. Finally, few studies have also used fine wire  
96 electromyography with ultrasound imaging to assess motor unit behaviour in relation to  
97 contraction dynamics (Pasquet *et al.*, 2005, 2006; Lauber *et al.*, 2014), however, due to its high  
98 selectivity, this technique can only sample a small muscle region, which results in relatively low  
99 samples of individual motor units (Farina *et al.*, 2016), reducing the ability to correlate neural  
100 drive received by muscles to the mechanical output.

101 Ultrasound translucent high-density EMG (HDEMG-US) electrodes have been developed to  
102 enable emerging techniques to sample larger numbers of motor units during muscle contractions  
103 (Botter *et al.*, 2013). This approach allows simultaneous recording of high-density EMG with  
104 ultrasound images sampled from the same region of interest. The technique has the potential to  
105 improve our understanding of the neuromechanical determinants of movement, however to-  
106 date this method has not been used to relate single motor unit discharge characteristics (e.g.  
107 blind-source separation decomposition) with dynamic fascicle movement tracked from the  
108 ultrasound images.

109 Our primary aim was to develop a method to assess motor unit firing characteristics in relation  
110 to muscle fascicle dynamics during force development and sustained isometric contraction. To  
111 demonstrate the efficacy of using fascicle length changes to understand modulations in motor  
112 unit discharge properties, we examined the relationship between motor unit cumulative spike  
113 train (CST) and both fascicle length changes and dorsiflexion torque output of the tibialis anterior

114 muscle. Because the fascicle shortening during isometric contraction is related to force output  
115 (due to stretch of the in-series tendon), we expect the correlation between CST and fascicle  
116 shortening will be similar to that between CST and torque, but with a reduced lag due to the  
117 faster conversion of motor unit activity into contraction (compared to the conversion of motor  
118 unit activity into torque). We also examined differences in recruitment threshold when  
119 considered in terms of fascicle length or torque, as possible delays between these signals, might  
120 affect the interpretation of motor unit recruitment and de-recruitment thresholds.

121

## 122 **METHODS**

123 The study was conducted at the school of Human Movement and Nutrition Sciences of the  
124 University of Queensland, Australia. All procedures were approved by the University of  
125 Queensland ethical committee (approval number: 2019001675) and were conducted in  
126 accordance with the Declaration of Helsinki. Ten healthy young male volunteers participated  
127 [age: mean (SD) 29 (5) years]. Exclusion criteria included any neuromuscular disorder,  
128 musculoskeletal injuries such as muscle strain as well as any current or previous history of lower  
129 limb pain/injury and age <18 or >35 years. Participants were asked to avoid any strenuous activity  
130 24 h before the measurements.

### 131 *Task*

132 Participants were seated in a reclined position on the chair of an isokinetic dynamometer (Humac  
133 Norm, CSMi Computer Sports Medicine, Stoughton, USA). The right leg (dominant for all  
134 participants) was extended and positioned over a support with the knee flexed to 10° (with 0°  
135 representing full knee extension). The centre of rotation of the ankle joint (lateral malleoli) was

136 aligned to the centre of rotation of the isokinetic dynamometer in order to accurately quantify  
137 ankle dorsi-flexion torque. Participants performed sustained and torque-varying isometric  
138 dorsiflexion contractions at different torque levels at short (ankle at 0° plantar flexion) and long  
139 muscle lengths (ankle at 30° plantar flexion). A study schematic describing the measurements  
140 performed during the session can be seen in **Figure 1**. The session began with the participants'  
141 performing three isometric ankle dorsiflexion maximum voluntary contractions (MVC) at each  
142 ankle angle, where each MVC was separated by 2-min of rest. The order in which the ankle was  
143 positioned (short and long tibialis anterior lengths) was randomized. Following the MVC  
144 assessment, participants were allowed to practice with visual feedback of their exerted torque  
145 (displayed on a computer monitor), by performing brief ramp-hold contractions at low torque  
146 levels (20% MVC). Then, after 5 min of rest, participants performed ramp-hold (sustained) and  
147 torque-varying sinusoidal contractions at 20% or 40% MVC. For sustained isometric contractions,  
148 participants were asked to increase their torque at a rate of 10% MVC/s and then to hold the  
149 contraction at the target level for 30 s, therefore reaching the 20% MVC target in 2 s and the 40%  
150 MVC in 4 s. Two sustained 20% MVC and two sustained 40% MVC contractions were performed.  
151 For the torque-varying sinusoidal isometric contractions, the participants reached an average  
152 torque target of 20 and 40% MVC, at a frequency of 0.5 Hz and amplitude modulation of 5% MVC.  
153 One sinusoidal contraction per torque level was performed. These sinusoidal contractions aimed  
154 to test the ability of both the motor unit decomposition and fascicle tracking algorithms to  
155 identify motor units and track changes in fascicle length in conditions where the variability of  
156 motor unit firing and fascicle length is increased. All these isometric contractions were executed

157 in a randomized order across participants at each muscle length, but the order of the  
158 randomization was kept constant between 0° and 30° of plantar flexion.

### 159 *Electromyography*

160 Surface EMG signals were recorded from the tibialis anterior muscle using a high-density, 32-  
161 channel, HDEMG-US electrode grid (LiSIN, Torino, Italy) (Botter *et al.*, 2013). Each grid consists of  
162 8 x 4 electrodes (1-mm diameter, 10-mm interelectrode distance in both directions) embedded  
163 into a layer of silicon rubber (**Figure 2A**). The array was located centrally between the proximal  
164 and distal tendons of the muscle, with the columns oriented parallel to the tibia bone (Martinez-  
165 Valdes *et al.*, 2020b). Skin-electrode contact was made by inserting conductive gel (Sonogel, Bad  
166 Camberg, Germany) into the electrode cavities with a mechanical pipette (Eppendorf, Hamburg,  
167 Germany) as seen previously (Botter *et al.*, 2013). Signals were amplified and recorded using a  
168 new wireless wearable HDEMG amplifier (Cerone *et al.*, 2019) (**Figure 2B**), directly connected to  
169 the grid of electrodes, which is ideal when HDEMG measurements are combined with other  
170 methods such as ultrasound imaging. The amplifier was light and compact (16.7 g and 3.4 cm x  
171 3 cm x 1.5 cm), and contained a 16-bit analogue-digital converter. For this experiment, data was  
172 recorded in monopolar mode at a sampling frequency of 2048 Hz, with a gain of  $192 \pm 1$  V/V and  
173 a band-pass filter with cut-off frequencies between 10-500 Hz. Torque data was also sampled at  
174 2048Hz and recorded through the auxiliary input of the HDEMG amplifier. All EMG and torque  
175 data were processed and analysed offline using MATLAB 2019b (MathWorks Inc., Natick, MA).

### 176 *Ultrasonography*

177 Ultrasound images of tibialis anterior fascicles were captured using B-mode ultrasonography (6  
178 MHz, 80 frames per second, 60 mm field of view) using a 128-element multi-frequency



179 transducer (LF9-5N60-A3; Telemed, Vilnius, Lithuania) attached to a PC-based ultrasound system  
180 (ArtUs EXT-1H scanner; Telemed, Vilnius, Lithuania). A dry HDEMG-US grid (without conductive  
181 gel) was first used to find the best alignment of the probe allowing clear visualization of the  
182 muscle's fascicles when the probe is placed over the electrodes. Once the optimal position was  
183 identified, the skin was marked with an indelible pen. Then, the HDEMG-US electrode grid  
184 electrode cavities were filled with conductive gel and positioned over the tibialis anterior muscle.  
185 The flat-shaped ultrasound transducer was then placed over the electrode grid and firmly  
186 strapped over the leg using an elastic bandage to prevent any movement. An example of the  
187 setup and an ultrasound image can be seen in **Figure 2B**.

#### 188 *HDEMG and ultrasound synchronization*

189 Torque, position, HDEMG, and ultrasound data were synchronized utilising an analogue pulse  
190 sent from an AD board (Micro 1401-3, Cambridge Electronic Design, Cambridge, UK). The trigger  
191 signal was set at 80 Hz and controlled frame by frame the ultrasound recording (i.e. every time  
192 the beamformer received a pulse, one frame of ultrasound data was recorded). The same trigger  
193 signal was sent to the auxiliary input of the HDEMG device and was aligned offline with the  
194 tracked fascicle data (see next section) obtained from the ultrasound files.

#### 195 *Motor unit decomposition and fascicle length tracking*

196 The HDEMG signals were decomposed into motor unit spike trains with an extensively validated  
197 blind source separation algorithm, which provides automatic identification of the activity of  
198 multiple single motor units (Negro *et al.*, 2016). Each identified motor unit was assessed for  
199 decomposition accuracy with a validated metric (Silhouette, SIL), which represents the sensitivity  
200 of the decomposed spike train. Since the identification of motor unit activity with HDEMG-US

201 grids is more challenging due to the lower selectivity of these grids (i.e., 32 channels and inter-  
202 electrode distance of 10 mm), an accuracy level of 0.86 SIL (86% of accuracy) was used to approve  
203 or discard any motor unit (usual threshold is set at 0.90 SIL (Negro *et al.*, 2016; Martinez-Valdes  
204 *et al.*, 2020a). Moreover, further examination of each spike train was performed, and all firings  
205 separated from the next by <33.3 ms or >200 ms were re-checked manually by an experienced  
206 operator E.M.-V. (Afsharipour *et al.*, 2020; Cogliati *et al.*, 2020) and the motor unit pulse trains  
207 were re-computed. After this procedure, the average SIL value increased to 0.90 (0.007).

208 Tibialis anterior fascicle length changes were tracked offline by employing custom-made  
209 software (Farris & Lichtwark, 2016) utilizing a previously validated Lucas-Kanade optical flow  
210 algorithm with affine transformation (Gillett *et al.*, 2013; Farris & Lichtwark, 2016). From each  
211 trial, we selected the fascicle in which we were able to visualize ~80% of its length within the field  
212 of view of the image. We selected a fascicle from the anterior compartment of the tibialis anterior  
213 muscle because 1) this was the region of motor unit activity that was likely covered by the  
214 HDEMG electrode and 2) our preliminary results showed that changes in fascicle length from this  
215 region are enough to explain at least 70% of the variance in the resultant torque output (see  
216 results). Changes in fascicle length were analysed according to shortening length [ $\Delta$  fascicle  
217 length (i.e. difference in fascicle length from rest to target torque (20% MVC)], in order to 1)  
218 understand the amount of fascicle shortening required to recruit a motor unit and reach the  
219 required torque level (20% MVC and 40% MVC), and 2) to be able to correlate fluctuations in  
220 fascicle length with fluctuations in motor unit discharge rate, since absolute changes in fascicle  
221 length go in an opposite direction to discharge rate (fascicle length decreases when discharge  
222 rate increases, see next section). We also estimated pennation angle as the angle between the

223 fascicle and its insertion into the central aponeurosis (Reeves & Narici, 2003). The pennation  
224 angle was calculated when the muscle was at rest and when the torque was stable during the  
225 isometric contractions.

#### 226 *Concurrent motor unit and fascicle length analysis*

227 For sustained isometric contractions, mean discharge rate was calculated from the stable plateau  
228 torque region. Motor unit recruitment and de-recruitment thresholds were defined as the ankle  
229 dorsiflexion torques (%MVC) or fascicle shortening lengths ( $\Delta$ fascicle length, mm) at the times  
230 when the motor units began and stopped discharging action potentials, respectively. For these  
231 contractions we also tested the possibility to track the same motor units across the two different  
232 target torques and muscle lengths, with a previously proposed method based on cross-  
233 correlation of 2D motor unit action potentials (MUAPs) (Martinez-Valdes *et al.*, 2017b). In this  
234 procedure, MUAP matches between the two correlated trials (i.e. 20% MVC-0° vs 20% MVC-30°)  
235 were visually inspected and the two identified motor units were regarded as the same when they  
236 had a cross-correlation coefficient  $>0.80$  (Martinez-Valdes *et al.*, 2017b). Cross-correlation (time  
237 domain) analysis was also used to assess the interplay between torque, fascicle length and motor  
238 unit firing data. For this purpose, motor unit discharge times were summed to generate a  
239 cumulative spike train (CST) as done previously (Thompson *et al.*, 2018). Fascicle length signals  
240 were interpolated to 2048Hz to match both motor unit and torque data. After these procedures,  
241 the CST, fascicle length and torque signals were low-pass filtered (4th order zero-phase  
242 Butterworth, 2Hz) and then high-pass filtered (4th order zero-phase Butterworth, 0.75Hz) as  
243 presented previously (De Luca & Erim, 1994). These filtered signals were then cross-correlated  
244 to assess similarities in their fluctuations (cross-correlation coefficient) and to calculate the lags

245 between CST vs torque, CST vs fascicle length and fascicle length vs torque. These assessments  
246 provided information on the delays generated between the neural drive and torque output,  
247 neural drive and muscle contraction and, muscle contraction and torque output.

#### 248 *Statistical Analysis*

249 Results are expressed as mean and (SD). Normality of the data was assessed with the Shapiro-  
250 Wilk test and Sphericity was tested with the Mauchly test. Differences between fascicle  
251 parameters (absolute changes in length and pennation angle) at short and long muscle lengths  
252 during rest were assessed with paired t-tests. Absolute differences in fascicle length and  
253 pennation angle during isometric contractions were assessed with a two-way repeated measures  
254 ANOVA, with factors of muscle length (0° or 30° of plantar flexion) and torque (20 or 40% MVC).  
255 For motor unit/ $\Delta$ fascicle length data during isometric contractions the following statistical tests  
256 were employed: 1) two-way repeated measures ANOVA with factors of muscle length and torque  
257 to assess differences in discharge rate 2) three-way repeated measures ANOVA with factors of  
258 muscle length, torque and signal comparison (CST vs torque, fascicle length vs CST, and torque  
259 vs fascicle length) to assess differences in cross-correlation results (correlation coefficient and  
260 lag) 3) three-way repeated measures analysis of variance (ANOVA) with factors of muscle length,  
261 torque and recruitment (recruitment vs de-recruitment) to assess differences between  
262 recruitment and de-recruitment thresholds (in terms of %MVC torque and  $\Delta$ fascicle length).  
263 Finally, all cross-correlation results obtained during sustained and sinusoidal contractions were  
264 averaged for each contraction type and compared by paired t-test. All ANOVA analyses were  
265 performed on STATISTICA 12 (Statsoft, Tulsa, USA) and followed by pairwise comparisons with a

266 Student-Newman-Keuls (SNK) post hoc test when significant. Statistical significance was set at  
267  $p < 0.05$ .

## 268 **RESULTS**

### 269 *Maximal torque, motor unit decomposition and tracking during isometric contractions*

270 The MVC dorsiflexion torque differed at the two ankle positions and was 25.2 (13.2) and 51.8  
271 (12.5) Nm at short (0° plantarflexion) and long (30° plantarflexion) muscle lengths, respectively  
272 ( $p < 0.001$ ). During both sustained and sinusoidal isometric contractions, an average of 7 (3), 7 (2),  
273 7 (3) and 6 (2) motor units could be identified per participant at 20% MVC-0°, 20% MVC-30°, 40%  
274 MVC-0° and 40% MVC-30°, respectively. A representative example with the decomposition  
275 results from one participant can be seen in **Figure 3**. In this particular example, each motor unit  
276 has a clearly distinct MUAP shape (right side of the figure) which allowed accurate identification  
277 of discharge times (left side of the figure). An average of 3 (2) motor units could be tracked  
278 successfully per participant across the two muscle lengths [2D MUAP cross-correlation coefficient  
279 0.83 (0.03)] and 3 (1) motor units per participant across the two torque levels [2D MUAP cross-  
280 correlation coefficient 0.88 (0.05)]. A representative example of the tracking procedure across  
281 the two joint angles with the HDEMG-US grids can be seen in **Figure 4**.

### 282 *Relationships between fascicle length, torque and motor unit discharge rate during isometric* 283 *contractions*

284 Absolute fascicle lengths and pennation angles during rest and isometric contractions at the  
285 different torque targets and joint angles are presented in **Table 1**. Overall, tibialis anterior  
286 fascicles were longer and had smaller pennation angles at 30° of plantar flexion at rest and during  
287 contractions ( $p < 0.001$ ). Nevertheless, fascicle lengths decreased (torque effect:  $p < 0.001$ ,

288  $\eta^2=0.78$ ) and pennation angles increased (torque effect:  $p=0.018$ ,  $\eta^2=0.48$ ) similarly with  
289 increasing torque at both  $0^\circ$  and  $30^\circ$  of plantarflexion.

**Table 1.** Fascicle length and pennation angles at rest and during sustained isometric contractions at 20% and 40% MVC at short and long muscle lengths

|                                       | Short ( $0^\circ$ plantar flexion) | Long ( $30^\circ$ plantar flexion) | P-value |
|---------------------------------------|------------------------------------|------------------------------------|---------|
| Pennation angle ( $^\circ$ ), rest    | 15.2 (1.7)                         | 12.0 (1.7)                         | <0.001  |
| Fascicle length (mm), rest            | 60.2 (8.8)                         | 74.5 (9.1)                         | <0.001  |
| Pennation angle ( $^\circ$ ), 20% MVC | 19.2 (3.7)                         | 16.9 (3.9)                         | 0.001#  |
| Fascicle length (mm), 20% MVC         | 52.7 (7.5)                         | 66.3 (9.4)                         | <0.001* |
| Pennation angle ( $^\circ$ ), 40% MVC | 20.8 (3.1)                         | 17.4 (4.0)                         | 0.001#  |
| Fascicle length (mm), 40% MVC         | 50.8 (6.9)                         | 61.9 (7.9)                         | <0.001* |

\*Significant effect of torque ( $p<0.001$ )

#Significant effect of torque ( $p=0.018$ )

290 Similar to the changes in fascicle length, the tracking of individual motor units across short and  
291 long muscle lengths revealed similar discharge rates at the different joint angles (15.3 (2.6) Hz  
292 and 14.7 (1.4) Hz at 20% MVC, and 16.7 (2.3) Hz and 17.0 (2.4) Hz at 40% MVC, between  $0^\circ$  and  
293  $30^\circ$  of plantar flexion, respectively, muscle length effect:  $p=0.74$ ,  $\eta^2=0.047$ ), but increased firing  
294 frequency between the different torque levels (torque effect:  $p=0.03$ ,  $\eta^2=0.43$ ). A representative  
295 example of the concurrent assessment of changes in fascicle length, torque and CST can be seen  
296 in **Figure 5**. Briefly, after the offline identification/tracking of the fascicle (**Figure 5A**), and the  
297 identification/editing of the motor unit spike trains and subsequent conversion to CSTs, three  
298 signals were obtained: torque, fascicle length and CST. All these signals were then cross-  
299 correlated on the stable torque part of the contraction (**Figure 5B**, upper panel) in order to assess  
300 common fluctuations between torque, CST and fascicle length signals. All comparisons showed  
301 high levels of cross-correlation (CST vs torque, CST vs fascicle length and fascicle vs torque, **Figure**

302 **5B**, bottom panel) and the lags obtained, showed the delay between: neural drive and resultant  
303 torque output (CST vs torque), neural drive and muscle contraction (CST vs fascicle length) and,  
304 muscle contraction and resultant torque output (fascicle length vs torque). The cross-correlation  
305 results for the group of participants are presented in **Table 2**. Overall, all cross-correlation  
306 coefficients were high as each of the signals could explain on average, at least 50% of the variance  
307 in resultant torque, CST and fascicle length, showing that there was a strong relationship between  
308 these variables. It is worth noting that all correlation coefficients were higher during the  
309 sinusoidal contractions ( $p=0.001$ , **Table 2**). Nevertheless, the cross-correlation between CST vs  
310 fascicle length was significantly smaller compared to the other signal comparisons in both  
311 contraction types (signal comparison effect:  $p=0.007$ ,  $\eta^2=0.427$  and  $p<0.0001$ ,  $\eta^2=0.846$ , for  
312 sustained and sinusoidal contractions, respectively). Cross-correlation lags (**Figure 6**) during  
313 sustained isometric contractions at  $30^\circ$  of plantar flexion were larger than those at  $0^\circ$  plantar  
314 flexion at both torque levels in all signal comparisons, in both sustained (muscle length effect:  
315  $p=0.002$ ,  $\eta^2=0.66$ ) and torque-varying sinusoidal (muscle length effect:  $p=0.034$ ,  $\eta^2=0.39$ )  
316 isometric contractions, with no differences between sustained vs sinusoidal isometric lag values.

317

318

319

320

321

322

**Table 2.** Cross-correlation coefficients for comparisons between cumulative spike train (CST) vs torque,<sup>323</sup> CST vs fascicle length and torque vs fascicle length during isometric contractions.

|                                    | Short length<br>20% MVC | Long Length<br>20% MVC | Short length<br>40%MVC | Long length<br>40% MVC <sup>325</sup> |
|------------------------------------|-------------------------|------------------------|------------------------|---------------------------------------|
| Steady isometric contractions      |                         |                        |                        |                                       |
| Torque vs CST                      | 0.74 (0.65-0.88)        | 0.74 (0.62-0.85)       | 0.74 (0.63-0.85)       | 0.61 (0.31-0.78)                      |
| Fascicle vs CST                    | 0.64 (0.51-0.81)        | 0.57 (0.31-0.75)       | 0.63 (0.33-0.85)       | 0.50 (0.31-0.66)                      |
| Torque vs Fascicle                 | 0.71 (0.40-0.88)        | 0.67 (0.33-0.89)       | 0.78 (0.33-0.93)       | 0.72 (0.50-0.91)                      |
| Oscillatory isometric contractions |                         |                        |                        |                                       |
| Torque vs CST                      | 0.78 (0.66-0.89)        | 0.77 (0.62-0.83)       | 0.77 (0.66-0.89)       | 0.66 (0.45-0.82)                      |
| Fascicle vs CST                    | 0.71 (0.58-0.86)        | 0.73 (0.69-0.78)       | 0.74 (0.60-0.86)       | 0.62 (0.41-0.75)                      |
| Torque vs Fascicle                 | 0.87 (0.75-0.95)        | 0.89 (0.75-0.95)       | 0.91 (0.80-0.96)       | 0.89 (0.77-0.96)                      |

Results are expressed as mean (min-max range).

326 *Variations in fascicle length and recruitment threshold and during isometric contractions*

327 Motor unit recruitment and de-recruitment thresholds in terms of both  $\Delta$ fascicle length (mm)  
 328 and torque (%MVC) are shown for a representative participant in **Figure 7A**. The figure shows  
 329 that recruitment threshold torque is higher than the torque at de-recruitment, however, the  
 330  $\Delta$ fascicle length at which motor units were recruited and de-recruited was similar. This was  
 331 confirmed in motor units that were tracked across short and long muscle lengths as de-  
 332 recruitment thresholds were consistently lower when assessed in terms of %MVC torque  
 333 (recruitment-de-recruitment effect:  $p=0.029$ ,  $\eta^2=0.43$ , **Figure 7B**) but similar in terms of  $\Delta$ fascicle  
 334 length (recruitment-de-recruitment effect  $p=0.805$ ,  $\eta^2=0.007$ , **Figure 7B**). In addition, although  
 335 recruitment and de-recruitment thresholds increased in terms %MVC torque across 20% and 40%  
 336 MVC levels (torque effect:  $p=0.001$ ,  $\eta^2=0.701$ ), motor units were recruited and de-recruited at a  
 337 similar  $\Delta$ fascicle length with increasing torque (torque effect:  $p=0.731$ ,  $\eta^2=0.014$ ). Finally,



338 recruitment-de-recruitment thresholds also increased at long muscle lengths (0° plantar flexion  
339 vs 30° plantar flexion) when considered as %MVC torque (muscle length effect:  $p < 0.001$ ,  $\eta^2 = 0.77$ )  
340 but not in terms of  $\Delta$ fascicle length (muscle length effect:  $p = 0.389$ ,  $\eta^2 = 0.014$ ).

## 341 **DISCUSSION**

342 This is the first study showing simultaneous assessment of motor unit firing properties with  
343 changes in fascicle length, on the same region of interest, with HDEMG-US electrodes. Most  
344 importantly, these changes could be analysed at different torque levels and over a relatively large  
345 range of ankle joint motion (0° to 30° of plantar flexion). With the combination of these  
346 techniques, we identified strong relationships between fluctuations in tibialis anterior discharge  
347 rate and fascicle length, as well as fluctuations in fascicle length and the torque produced. These  
348 relationships allowed us to quantify the delays between motor unit firing activity and muscle  
349 contraction, and muscle contraction and joint torque. As we hypothesised, we were able to show  
350 that the delay between CST and fascicle length was smaller than that of CST and torque, which  
351 shows that previous measures of electromechanical delay between EMG (Cavanagh & Komi,  
352 1979) or motor unit discharge patterns (Del Vecchio *et al.*, 2018) and force/torque might not  
353 provide an adequate estimation of the conversion of neural activity into muscle contraction. In  
354 addition, we demonstrated that the delays between the neural drive and fascicle length or the  
355 generated force/torque are larger when the muscle contracts isometrically at longer fascicle  
356 lengths (**Figure 6**). Finally, due to the possibility to track motor units across different muscle  
357 lengths and target torques, we were also able to show that recruitment and de-recruitment  
358 thresholds are similar when considered in terms of fascicle length, meaning that motor units are  
359 recruited and de-recruited at the same relative fascicle length, regardless of the joint position or

360 torque exerted. Taken together, the findings of the present study have enhanced our  
361 understanding of the interaction between motor unit firing and mechanisms of muscle  
362 contraction.

363 This study is the first to decompose motor unit activity from HDEMG-US grids. The findings  
364 showed that an average of 7 motor units could be accurately identified per participant during  
365 isometric contractions. The motor units identified with HDEMG-US electrodes had clear distinct  
366 MUAP shapes and show differences in activity across different regions of the electrode grid  
367 (**Figure 3**). Moreover, by employing the 2D spatial representation of MUAPs we were able to  
368 track approximately 40% of the identified motor units across torques and joint angles (**Figure 4**).

369 We previously showed the possibility to track motor units across different force levels with  
370 HDEMG, by employing 2D MUAP “signatures” (Martinez-Valdes *et al.*, 2017b). Indeed, the  
371 advantage of HDEMG systems is that they show a large spatial representation of MUAPs, which  
372 can be used to follow the same units within and across sessions. This methodology has been  
373 successfully employed in a number of studies (Martinez-Valdes *et al.*, 2017a; Boccia *et al.*, 2019;  
374 Del Vecchio *et al.*, 2019; Murphy *et al.*, 2019). We expanded on that possibility and tracked motor  
375 units across different muscle lengths obtaining good results (average correlation of 0.83 between  
376 MUAPs). This shows that HDEMG-US electrodes allow the concurrent assessment of changes in  
377 motor unit discharge and fascicle length and linking those changes to motor units that can be  
378 followed across different joint angles and torque levels, enabling a more reliable assessment of  
379 neuromechanical variables.

380 A number of studies have shown that fluctuations in firing rate are closely related to the  
381 fluctuations in torque/force (Negro *et al.*, 2009; Del Vecchio *et al.*, 2018; Thompson *et al.*, 2018).

382 Considering this observation, we attempted to quantify the level of correlation between  
383 fluctuations in firing rate (CST), changes in fascicle length and torque, in order to first,  
384 corroborate that the information obtained from the identified motor units was linked to the  
385 fascicles of the region of interest (CST vs fascicle length correlation) and also to confirm that  
386 motor unit firings identified with HDEMG-US grids would be able to predict the torque produced  
387 via the tendon. The findings showed that all of the signals compared had high levels of correlation  
388 (CST explained ~70% and ~60% of the variance in torque and fascicle length respectively),  
389 confirming that the motor unit data obtained from HDEMG-US grids provided a good  
390 representation of the fascicle behaviour of the region of interest. Moreover, all correlation levels  
391 increased further when greater torque variability was induced during sinusoidal contractions,  
392 which first, confirms the ability of the decomposition algorithm to detect faster changes in motor  
393 unit firing and second, shows that the ability of the fascicle tracking algorithm to follow changes  
394 in length is improved when more variable isometric contractions are performed. It is important  
395 to mention that this greater variability did not affect cross-correlation lags as similar delays were  
396 observed in both sustained and oscillatory contractions (**Figure 6**), which shows the robustness  
397 of the approach. The lower correlation between CST and fascicle length (**Table 2**) during both  
398 sustained and sinusoidal isometric contractions could be explained by a number of factors,  
399 including the subtle inaccuracies in fascicle length determination from ultrasound imaging and  
400 potential mismatches between fibres contributing to CST and the fibres in the imaging region. It  
401 is possible that the fascicle tracking code or the sampling frequency employed to obtain the  
402 images (80Hz) was not sensitive enough to detect smaller changes in fascicle length, particularly  
403 during sustained contractions. However, the sampling frequency is well above the frequency of

404 variation in force during isometric contraction (<5Hz (Farina & Negro, 2015)) and tremor (5-13Hz,  
405 (Yavuz *et al.*, 2015)). Therefore, it is more likely that limitations in imaging the muscle in a single  
406 plane and the resolution of the tracking algorithm may contribute to the lower correlations. The  
407 depth at which we tracked the fascicles (superficial portion of the tibialis anterior) vs region of  
408 motor units recorded may also contribute to discrepancies in the signal correlations; the HDEMG-  
409 US electrodes are most likely to only detect motor unit activity of the most superficial motor units  
410 (Farina *et al.*, 2002). If we also consider that blind-source separation motor unit decomposition  
411 techniques favour the identification of motor units showing the largest MUAPs and the highest  
412 spatial localization on the HDEMG grid (Holobar & Farina, 2014; Negro *et al.*, 2016), it is very likely  
413 that the motor units included in the analysis mainly represent the superficial region of tibialis  
414 anterior. Nevertheless, it is important to note that our technique provided moderate-high cross-  
415 correlations between CST and fascicle length during isometric contractions, which demonstrates  
416 feasibility of using such approach to understand the link between motor unit recruitment and  
417 muscle mechanics during actual movement.

418 One of the most interesting findings from this study was the possibility of quantifying delays  
419 between CST vs. fascicle length and fascicle length vs. torque. Cross-correlation lags revealed that  
420 the time required to shorten the fascicle (conversion of motor unit firings into contraction) was  
421 smaller than the time required to produce mechanical output (torque). This finding implies that  
422 imaging of the muscle is necessary to determine the time required to convert motor unit  
423 discharge activity into contraction. Historically, the conversion of neural activity into mechanical  
424 output has usually been assessed by calculating the time-difference between the onset of  
425 force/torque and muscle activation (also known as the electromechanical delay (Cavanagh &

426 Komi, 1979)). This assessment, however, assumes that there is no lag between the generation of  
427 a contraction and the transmission of force to the tendon and then transmission to the measuring  
428 apparatus. More recent studies that have combined conventional bipolar EMG and ultrasound  
429 during voluntary contractions have found that fascicle shortening happen before force/torque is  
430 measured (Begovic *et al.*, 2014; Ling *et al.*, 2020), which agrees with our findings. Nevertheless,  
431 this assessment has several issues, first, the onset of muscle activation from bipolar EMG signals  
432 can be greatly influenced by the electrode's location (Hug *et al.*, 2011), second, fascicle  
433 shortening from deeper muscle regions could happen before EMG activity is detected on the  
434 surface (Dieterich *et al.*, 2017) and third, the assessment can be confounded by the mechanical  
435 impedances of the measuring device (Corcos *et al.*, 1992). Thus, absolute values of  
436 electromechanical delay might not provide a reliable assessment of the mechanisms responsible  
437 for force generation and transmission (Corcos *et al.*, 1992). For these reasons, we propose that  
438 cross-correlation of signals obtained from HDEMG-US motor unit decomposition and ultrasound  
439 could provide a better estimation of these delays, as such assessment considers mechanisms  
440 responsible for contraction dynamics (i.e. fascicle length responses to firing rate modulations)  
441 rather than just assessing delay differences between signals at contraction onset. It is important  
442 to mention that our proposed approach shows longer delays in comparison with classical  
443 estimations of electromechanical delay (~150ms of delay between CST and torque vs. ~50ms  
444 between EMG and torque (Begovic *et al.*, 2014)), possibly due to the time-instant in which these  
445 relationships are quantified (contraction onset vs. sustained/torque varying contraction), twitch  
446 characteristics of the active motor units (Del Vecchio *et al.*, 2018) and changes in MUAP duration  
447 during the contraction. Improved HDEMG decomposition techniques allowing accurate

448 identification of motor unit activity before contraction onset (which is not currently possible),  
449 would allow comparing the delays obtained during force development and sustained  
450 contractions, in order to assess potential differences in signal transmission in different phases of  
451 isometric contractions.

452 Another interesting result obtained from the cross-correlation lags was that both CST vs. fascicle  
453 length and fascicle length vs. torque delays increased when the muscle contracted isometrically  
454 in a lengthened position (**Figure 6**). Changes in the duration of muscle-fibre twitch force and  
455 muscle-tendon compliance at larger muscle lengths likely influenced these delays. To provide  
456 support to the first observation, several studies have reported that muscle twitches are  
457 significantly larger (greater contraction and half-relaxation times) when the muscle is lengthened  
458 (Stephens *et al.*, 1975; Marsh *et al.*, 1981; Bigland-Ritchie *et al.*, 1992). Therefore, it is very likely  
459 that an increase in the overall duration of the motor unit responses at longer lengths is the reason  
460 for the more delayed muscle contraction and transmission of force to the tendon observed at  
461 the two submaximal normalized torque targets (20 and 40% MVC). In addition, changes in tendon  
462 and aponeurosis elasticity during lengthening could also reduce the amount of neural drive  
463 required to activate the muscle (Lichtwark & Wilson, 2007; Mayfield *et al.*, 2016; Raiteri *et al.*,  
464 2018) and potentially increase the delays between signals. Nevertheless, the assessment of both  
465 motor unit contractile properties and the effect of passive structural properties of the muscle on  
466 motor unit behaviour needs to be confirmed in future investigations. The assessment of these  
467 delays holds great potential in both healthy populations (e.g. aging) and patients (e.g. cerebral  
468 palsy), as they could help to quantify impairments in force transmission, when muscles have  
469 altered architecture (e.g. muscle contractures).

470 The current methodology presents multiple opportunities to assess interactions between motor  
471 unit firing rate/recruitment and changes in fascicle length, however, for this report we wanted  
472 to focus on the assessment of recruitment and de-recruitment thresholds in relation to both  
473 %MVC torque and fascicle length. We selected these variables because motor unit studies  
474 typically use torque to assume changes in muscle behaviour, and delays between motor unit  
475 firing and torque due to force transmission delays (along muscle/tendon and also within  
476 dynamometer) would create offsets when comparing recruitment (torque rise) vs de-recruitment  
477 (torque drop). The findings from this study in these assessed variables, emphasise the need of  
478 quantifying changes in motor unit activity and fascicle length simultaneously. First, we were able  
479 to observe that recruitment and de-recruitment thresholds differed when quantified as % MVC  
480 torque (recruitment threshold was higher than the de-recruitment threshold) but were similar  
481 when quantified in terms of fascicle length. To our knowledge, this is the first study showing this  
482 discrepancy. Moreover, we were able to observe that the length at which a motor unit was  
483 recruited and de-recruited was maintained across joint angles and torque levels. Fascicle  
484 shortening preceded torque generation (as expected), but fascicles returned to resting values  
485 after the dorsiflexion torque returned to 0 Nm, meaning that during the ramp-down phase of the  
486 contraction, there is a time-point where the muscle returns passively to its original length (**Figure**  
487 **7**). This can explain why most previous studies show lower torque values for de-recruitment than  
488 recruitment when considered as %MVC torque or absolute torque (De Luca, 1985; Romaguere  
489 *et al.*, 1993) and emphasizes the need to quantify these thresholds in terms of fascicle length and  
490 not in terms of joint force/torque. Interestingly, similar divergences were recently reported when

491 considering recruitment and de-recruitment in terms of joint angle or fascicle length during  
492 isometric plantarflexion contractions at varying knee-joint angles (Lauber *et al.*, 2014).  
493 Finally, it is worth mentioning that the accurate assessment of motor unit and fascicle data in a  
494 variety of contraction types, torque levels and joint positions, opens up the opportunity to  
495 explore more dynamic isometric contraction models (i.e., ballistic contractions or faster  
496 sinusoidal contractions) and shortening and lengthening contractions. Our present results were  
497 not affected by more dynamic variations in isometric torque and the tracking of motor units  
498 across joint angles revealed that MUAPs did not change substantially within the range of motion  
499 investigated (**Figure 4**). Very recent studies employing HDEMG recordings (without ultrasound)  
500 have successfully identified motor units during shortening and lengthening contractions (Glaser  
501 & Holobar, 2019; Oliveira & Negro, 2021), therefore, it is very likely that future studies assessing  
502 changes in motor unit activity and fascicle length will be able to assess these interactions during  
503 dynamic conditions.

504 In this study we were able identify an average of 7 motor units across contractions, which is lower  
505 than the number of units identified with non-transparent HDEMG electrodes, where  
506 approximately 15 to 20 motor units can be identified on the tibialis anterior muscle on average  
507 per participant (Martinez-Valdes *et al.*, 2020b). These differences can be attributed to a number  
508 of factors. First, the grid of electrodes employed in the current study contained 32 electrodes vs.  
509 the 64 electrodes conventionally employed to decompose EMG signals. It has been shown that a  
510 larger number of channels enhances the spatial identification of MUAPs and therefore improves  
511 the separation of the multiple motor unit sources from the HDEMG with blind-source separation  
512 methods (Farina *et al.*, 2008; Negro *et al.*, 2016). Second, the inter-electrode distance of the



513 HDEMG-US grid (10mm) is less selective than the 64-channel grids (8mm) commonly employed  
514 to decompose motor unit activity, which can again influence the separation of MUAPs from the  
515 HDEMG. Therefore, improvements in electrode construction will likely increase the number of  
516 motor units identified with HDEMG-US. Nevertheless, it is important to mention that we were  
517 still able to explain ~70% of the of the variance in torque with the number of identified units in  
518 the present study, which is similar to the values reported in previous studies (Negro *et al.*, 2009;  
519 Del Vecchio *et al.*, 2018; Thompson *et al.*, 2018). Finally, and as mentioned previously, muscle  
520 fascicle imaging using ultrasound also has some limitations in terms of the resolution of the image  
521 and ability to track length changes, as well as the limitation of only being able to image one plane  
522 of the muscle. Improvements in ultrasound probe construction and/or the addition of another  
523 ultrasound probe in a different portion of the electrode grid would likely help to improve  
524 estimations of changes in fascicle length during isometric contractions.

525 In conclusion, this study presents, for the first time, the possibility to identify motor units and  
526 track changes in fascicle length simultaneously, on the same region of interest, with HDEMG-US  
527 electrodes. We showed that this method can be employed over a wide range of conditions, and  
528 can provide important information about the inter-relationships between neural drive, fascicle  
529 length and torque, which provides new opportunities to assess the neural and mechanical  
530 determinants of muscle contractions in both health and disease.

531

532

533

534

535 **REFERENCES**

536 Afsharipour B, Manzur N, Duchcherer J, Fenrich KF, Thompson CK, Negro F, Quinlan KA, Bennett DJ &  
537 Gorassini MA. (2020). Estimation of self-sustained activity produced by persistent inward currents  
538 using firing rate profiles of multiple motor units in humans. *J Neurophysiol* **124**, 63-85.

539  
540 Barber LA, Barrett RS, Gillett JG, Cresswell AG & Lichtwark GA. (2013). Neuromechanical properties of the  
541 triceps surae in young and older adults. *Exp Gerontol* **48**, 1147-1155.

542  
543 Begovic H, Zhou GQ, Li T, Wang Y & Zheng YP. (2014). Detection of the electromechanical delay and its  
544 components during voluntary isometric contraction of the quadriceps femoris muscle. *Front*  
545 *Physiol* **5**, 494.

546  
547 Bigland-Ritchie BR, Furbush FH, Gandevia SC & Thomas CK. (1992). Voluntary discharge frequencies of  
548 human motoneurons at different muscle lengths. *Muscle Nerve* **15**, 130-137.

549  
550 Boccia G, Martinez-Valdes E, Negro F, Rainoldi A & Falla D. (2019). Motor unit discharge rate and the  
551 estimated synaptic input to the vasti muscles is higher in open compared with closed kinetic chain  
552 exercise. *J Appl Physiol (1985)* **127**, 950-958.

553  
554 Botter A, Vieira TM, Loram ID, Merletti R & Hodson-Tole EF. (2013). A novel system of electrodes  
555 transparent to ultrasound for simultaneous detection of myoelectric activity and B-mode  
556 ultrasound images of skeletal muscles. *J Appl Physiol (1985)* **115**, 1203-1214.

557  
558 Brown SH & McGill SM. (2010). A comparison of ultrasound and electromyography measures of force and  
559 activation to examine the mechanics of abdominal wall contraction. *Clin Biomech (Bristol, Avon)*  
560 **25**, 115-123.

561  
562 Cavanagh PR & Komi PV. (1979). Electromechanical delay in human skeletal muscle under concentric and  
563 eccentric contractions. *Eur J Appl Physiol Occup Physiol* **42**, 159-163.

564  
565 Cerone GL, Botter A & Gazzoni M. (2019). A Modular, Smart, and Wearable System for High Density sEMG  
566 Detection. *IEEE Trans Biomed Eng* **66**, 3371-3380.

567  
568 Cogliati M, Cudicio A, Martinez-Valdes E, Tarperi C, Schena F, Orizio C & Negro F. (2020). Half marathon  
569 induces changes in central control and peripheral properties of individual motor units in master  
570 athletes. *J Electromyogr Kinesiol* **55**, 102472.

571  
572 Corcos DM, Gottlieb GL, Latash ML, Almeida GL & Agarwal GC. (1992). Electromechanical delay: An  
573 experimental artifact. *J Electromyogr Kinesiol* **2**, 59-68.

574

- 575 Day JT, Lichtwark GA & Cresswell AG. (2013). Tibialis anterior muscle fascicle dynamics adequately  
576 represent postural sway during standing balance. *J Appl Physiol (1985)* **115**, 1742-1750.
- 577
- 578 De Luca CJ. (1985). Control properties of motor units. *J Exp Biol* **115**, 125-136.
- 579
- 580 De Luca CJ & Erim Z. (1994). Common drive of motor units in regulation of muscle force. *Trends Neurosci*  
581 **17**, 299-305.
- 582
- 583 Del Vecchio A, Casolo A, Negro F, Scorcelletti M, Bazzucchi I, Enoka R, Felici F & Farina D. (2019). The  
584 increase in muscle force after 4 weeks of strength training is mediated by adaptations in motor  
585 unit recruitment and rate coding. *J Physiol* **597**, 1873-1887.
- 586
- 587 Del Vecchio A, Ubeda A, Sartori M, Azorin JM, Felici F & Farina D. (2018). Central nervous system  
588 modulates the neuromechanical delay in a broad range for the control of muscle force. *J Appl*  
589 *Physiol (1985)* **125**, 1404-1410.
- 590
- 591 Dideriksen JL & Farina D. (2019). Amplitude cancellation influences the association between frequency  
592 components in the neural drive to muscle and the rectified EMG signal. *PLoS Comput Biol* **15**,  
593 e1006985.
- 594
- 595 Dideriksen JL, Negro F, Falla D, Kristensen SR, Mrachacz-Kersting N & Farina D. (2018). Coherence of the  
596 Surface EMG and Common Synaptic Input to Motor Neurons. *Front Hum Neurosci* **12**, 207.
- 597
- 598 Dieterich AV, Botter A, Vieira TM, Peolsson A, Petzke F, Davey P & Falla D. (2017). Spatial variation and  
599 inconsistency between estimates of onset of muscle activation from EMG and ultrasound. *Sci Rep*  
600 **7**, 42011.
- 601
- 602 Enoka RM. (2004). Biomechanics and neuroscience: a failure to communicate. *Exerc Sport Sci Rev* **32**, 1-3.
- 603
- 604 Farina D, Cescon C & Merletti R. (2002). Influence of anatomical, physical, and detection-system  
605 parameters on surface EMG. *Biol Cybern* **86**, 445-456.
- 606
- 607 Farina D & Negro F. (2015). Common synaptic input to motor neurons, motor unit synchronization, and  
608 force control. *Exerc Sport Sci Rev* **43**, 23-33.
- 609
- 610 Farina D, Negro F, Gazzoni M & Enoka RM. (2008). Detecting the unique representation of motor-unit  
611 action potentials in the surface electromyogram. *J Neurophysiol* **100**, 1223-1233.
- 612
- 613 Farina D, Negro F, Muceli S & Enoka RM. (2016). Principles of Motor Unit Physiology Evolve With Advances  
614 in Technology. *Physiology (Bethesda)* **31**, 83-94.

615  
616 Farris DJ & Lichtwark GA. (2016). UltraTrack: Software for semi-automated tracking of muscle fascicles in  
617 sequences of B-mode ultrasound images. *Comput Methods Programs Biomed* **128**, 111-118.

618  
619 Gillett JG, Barrett RS & Lichtwark GA. (2013). Reliability and accuracy of an automated tracking algorithm  
620 to measure controlled passive and active muscle fascicle length changes from ultrasound. *Comput*  
621 *Methods Biomech Biomed Engin* **16**, 678-687.

622  
623 Glaser V & Holobar A. (2019). Motor Unit Identification From High-Density Surface Electromyograms in  
624 Repeated Dynamic Muscle Contractions. *IEEE Trans Neural Syst Rehabil Eng* **27**, 66-75.

625  
626 Heintz S & Gutierrez-Farewik EM. (2007). Static optimization of muscle forces during gait in comparison  
627 to EMG-to-force processing approach. *Gait Posture* **26**, 279-288.

628  
629 Hodges PW, Pengel LH, Herbert RD & Gandevia SC. (2003). Measurement of muscle contraction with  
630 ultrasound imaging. *Muscle Nerve* **27**, 682-692.

631  
632 Holobar A & Farina D. (2014). Blind source identification from the multichannel surface electromyogram.  
633 *Physiol Meas* **35**, R143-165.

634  
635 Hug F, Lacourpaille L & Nordez A. (2011). Electromechanical delay measured during a voluntary  
636 contraction should be interpreted with caution. *Muscle Nerve* **44**, 838-839.

637  
638 Lauber B, Lichtwark GA & Cresswell AG. (2014). Reciprocal activation of gastrocnemius and soleus motor  
639 units is associated with fascicle length change during knee flexion. *Physiol Rep* **2**.

640  
641 Lichtwark GA & Wilson AM. (2007). Is Achilles tendon compliance optimised for maximum muscle  
642 efficiency during locomotion? *J Biomech* **40**, 1768-1775.

643  
644 Ling YT, Ma CZ, Shea QTK & Zheng YP. (2020). Sonomechanomyography (SMMG): Mapping of Skeletal  
645 Muscle Motion Onset during Contraction Using Ultrafast Ultrasound Imaging and Multiple Motion  
646 Sensors. *Sensors (Basel)* **20**.

647  
648 Marsh E, Sale D, McComas AJ & Quinlan J. (1981). Influence of joint position on ankle dorsiflexion in  
649 humans. *J Appl Physiol Respir Environ Exerc Physiol* **51**, 160-167.

650  
651 Martinez-Valdes E, Falla D, Negro F, Mayer F & Farina D. (2017a). Differential Motor Unit Changes after  
652 Endurance or High-Intensity Interval Training. *Med Sci Sports Exerc* **49**, 1126-1136.

653

- 654 Martinez-Valdes E, Negro F, Falla D, Dideriksen JL, Heckman CJ & Farina D. (2020a). Inability to increase  
655 the neural drive to muscle is associated with task failure during submaximal contractions. *J*  
656 *Neurophysiol* **124**, 1110-1121.
- 657  
658 Martinez-Valdes E, Negro F, Farina D & Falla D. (2020b). Divergent response of low- versus high-threshold  
659 motor units to experimental muscle pain. *J Physiol* **598**, 2093-2108.
- 660  
661 Martinez-Valdes E, Negro F, Laine CM, Falla D, Mayer F & Farina D. (2017b). Tracking motor units  
662 longitudinally across experimental sessions with high-density surface electromyography. *J Physiol*  
663 **595**, 1479-1496.
- 664  
665 Mayfield DL, Cresswell AG & Lichtwark GA. (2016). Effects of series elastic compliance on muscle force  
666 summation and the rate of force rise. *J Exp Biol* **219**, 3261-3270.
- 667  
668 Murphy S, Durand M, Negro F, Farina D, Hunter S, Schmit B, Gutterman D & Hynjstrom A. (2019). The  
669 Relationship Between Blood Flow and Motor Unit Firing Rates in Response to Fatiguing Exercise  
670 Post-stroke. *Front Physiol* **10**, 545.
- 671  
672 Negro F, Holobar A & Farina D. (2009). Fluctuations in isometric muscle force can be described by one  
673 linear projection of low-frequency components of motor unit discharge rates. *J Physiol* **587**, 5925-  
674 5938.
- 675  
676 Negro F, Muceli S, Castronovo AM, Holobar A & Farina D. (2016). Multi-channel intramuscular and surface  
677 EMG decomposition by convolutive blind source separation. *J Neural Eng* **13**, 026027.
- 678  
679 Oliveira AS & Negro F. (2021). Neural Control of Matched Motor Units during Muscle Shortening and  
680 Lengthening at Increasing Velocities. *J Appl Physiol (1985)*.
- 681  
682 Pasquet B, Carpentier A & Duchateau J. (2005). Change in muscle fascicle length influences the  
683 recruitment and discharge rate of motor units during isometric contractions. *J Neurophysiol* **94**,  
684 3126-3133.
- 685  
686 Pasquet B, Carpentier A & Duchateau J. (2006). Specific modulation of motor unit discharge for a similar  
687 change in fascicle length during shortening and lengthening contractions in humans. *J Physiol* **577**,  
688 753-765.
- 689  
690 Pincheira PA, Hoffman BW, Cresswell AG, Carroll TJ, Brown NAT & Lichtwark GA. (2018). The repeated  
691 bout effect can occur without mechanical and neuromuscular changes after a bout of eccentric  
692 exercise. *Scand J Med Sci Sports* **28**, 2123-2134.
- 693

694 Raiteri BJ, Cresswell AG & Lichtwark GA. (2018). Muscle-tendon length and force affect human tibialis  
695 anterior central aponeurosis stiffness in vivo. *Proc Natl Acad Sci U S A* **115**, E3097-E3105.

696

697 Reeves ND & Narici MV. (2003). Behavior of human muscle fascicles during shortening and lengthening  
698 contractions in vivo. *J Appl Physiol (1985)* **95**, 1090-1096.

699

700 Romaguere P, Vedel JP & Pagni S. (1993). Comparison of fluctuations of motor unit recruitment and de-  
701 recruitment thresholds in man. *Exp Brain Res* **95**, 517-522.

702

703 Son J, Hwang S & Kim Y. (2010). An EMG-based muscle force monitoring system. *Journal of Mechanical*  
704 *Science and Technology* **24**, 2099-2105.

705

706 Stephens JA, Reinking RM & Stuart DG. (1975). The motor units of cat medial gastrocnemius: electrical  
707 and mechanical properties as a function of muscle length. *J Morphol* **146**, 495-512.

708

709 Suzuki R, Kanehisa H, Washino S, Watanabe H, Shinohara M & Yoshitake Y. (2021). Reconstruction of net  
710 force fluctuations from surface EMGs of multiple muscles in steady isometric plantarflexion. *Exp*  
711 *Brain Res* **239**, 601-612.

712

713 Thompson CK, Negro F, Johnson MD, Holmes MR, McPherson LM, Powers RK, Farina D & Heckman CJ.  
714 (2018). Robust and accurate decoding of motoneuron behaviour and prediction of the resulting  
715 force output. *J Physiol* **596**, 2643-2659.

716

717 Tytell ED, Holmes P & Cohen AH. (2011). Spikes alone do not behavior make: why neuroscience needs  
718 biomechanics. *Curr Opin Neurobiol* **21**, 816-822.

719

720 Vieira TM & Botter A. (2021). The Accurate Assessment of Muscle Excitation Requires the Detection of  
721 Multiple Surface Electromyograms. *Exerc Sport Sci Rev* **49**, 23-34.

722

723 Yavuz US, Negro F, Falla D & Farina D. (2015). Experimental muscle pain increases variability of neural  
724 drive to muscle and decreases motor unit coherence in tremor frequency band. *J Neurophysiol*  
725 **114**, 1041-1047.

726

727 Yoshitake Y & Shinohara M. (2013). Low-frequency component of rectified EMG is temporally correlated  
728 with force and instantaneous rate of force fluctuations during steady contractions. *Muscle Nerve*  
729 **47**, 577-584.

730

731

732

733 **FIGURE LEGENDS**

734 **Figure 1.** Study schematic. MVC, maximum voluntary contraction torque.

735 **Figure 2.** High-density surface electromyography (HDEMG) ultrasound-transparent electrodes.

736 A) Back (up) and front (down) of the 32-channel (10 mm inter-electrode distance) electrode grid.

737 B) HDEMG electrode grid with 32-channel HDEMG amplifier (connected on top of the electrode)

738 and flat ultrasound probe can be seen on the left. Ultrasound image of proximal tibialis anterior

739 muscle can be seen on the right. Note the quality of the image with accurate visualization of

740 fascicles and, superficial, intermediate and deep aponeuroses.

741 **Figure 3.** Motor unit identification during isometric contractions. A total of 11 motor units (MUs)

742 were decomposed from the HDEMG signals in a representative participant during an isometric

743 contraction at 20% of the maximum voluntary torque ( $0^\circ$  of plantarflexion). Instantaneous firing

744 rate with torque profile can be seen on the left of the figure while 2D motor unit action potentials

745 (MUAPs) from each of these motor units can be seen on the right of the figure. Note the clear

746 differences in MUAP shape for each of the identified units.

747 **Figure 4.** Motor unit tracking. A representative example of a motor unit that was tracked across

748 two-plantarflexion angles at 20% MVC can be seen on the figure. For this motor unit, the action

749 potentials (single differential) had a cross correlation coefficient of 0.90 across angles. The

750 instantaneous firing rate of this unit can be seen on the bottom of the figure.

751 **Figure 5.** Fascicle length tracking procedure and correlation with torque and motor unit data. A)

752 A tibialis anterior ultrasound image and a fascicle of interest (red) can be seen on top of the

753 figure. The length data obtained from the tracking of this fascicle was then correlated with torque

754 and cumulative spike train (CST) signals (bottom). Fascicle length data is presented as the amount

755 of shortening from rest to target torque (fascicle length during rest-fascicle length reached at  
756 target torque). Note that fascicle shortening precedes the generation of torque during the ramp-  
757 up phase of the contraction and then returns to baseline values after the torque signal returns  
758 to zero. B) Common fluctuations from the three generated signals (torque, CST and fascicle  
759 length) in the steady-torque part of the contraction can be seen on top of the figure. Cross-  
760 correlation and lag (delay, ms) results between CST vs torque, CST vs fascicle length (fascicle) and  
761 fascicle vs torque can be seen on the bottom of the figure.

762 **Figure 6.** Cross-correlation lag (delay) results during sustained and sinusoidal isometric  
763 contractions. Delays between cumulative spike train (CST) vs torque, CST vs fascicle length  
764 (fascicle) and fascicle vs torque can be seen for sustained (A) and sinusoidal (B) isometric  
765 contractions at 0° and 30° of plantarflexion at 20% MVC and 40% MVC. \*, significant effect of  
766 joint angle ( $p < 0.05$ ).

767 **Figure 7.** Recruitment and de-recruitment thresholds in relation to torque and fascicle length. A  
768 representative example of recruitment and de-recruitment threshold of a motor unit in relation  
769 to torque and fascicle length can be seen on the left of the figure. The recruitment threshold for  
770 this unit was higher than the de-recruitment threshold when calculated as %MVC torque (green  
771 dashed line) but similar when calculated as fascicle shortening length (blue dashed line). Fascicle  
772 length data is presented as the amount of shortening from rest to target torque (fascicle length  
773 during rest-fascicle length reached at target torque). The same results can be appreciated by the  
774 group of participants on the right of the figure as recruitment thresholds are consistently higher  
775 than de-recruitment thresholds across target torques and angles when considered as %MVC  
776 torque (upper right) but similar when calculated from fascicle length data (lower right). \*,



777 significant effect of recruitment-de-recruitment ( $p<0.05$ ). #, significant effect of joint angle  
778 ( $p<0.05$ ).  $\Psi$ , significant effect of torque ( $p<0.05$ ).

779

## 780 **ADDITIONAL INFORMATION SECTION**

### 781 Author contributions

782 Experiments were performed at the School of Human Movement and Nutrition Sciences,  
783 University of Queensland, Queensland, Australia. E.M.-V. designed research; E.M.-V and P.P.  
784 performed experiments; E.M.-V. and F.N. analysed the data; E.M.-V., F.N., A.B., G.C., D.F., P.P.,  
785 G.L. and A.C. interpreted the data and contributed to the drafting of the article. All authors have  
786 read and approved final submission. All authors agree to be accountable for all aspects of the  
787 work, ensuring that questions related to the accuracy or integrity of any part are appropriately  
788 investigated and resolved. All persons designated as authors qualify for authorship, and all those  
789 who qualify for authorship are listed.

### 790 Competing interests

791 All authors declare no conflict of interest.

### 792 Funding

793 This study was partially funded with the University of Birmingham International Engagement Fund (BIEF)  
794 awarded to E.M.-V.

795

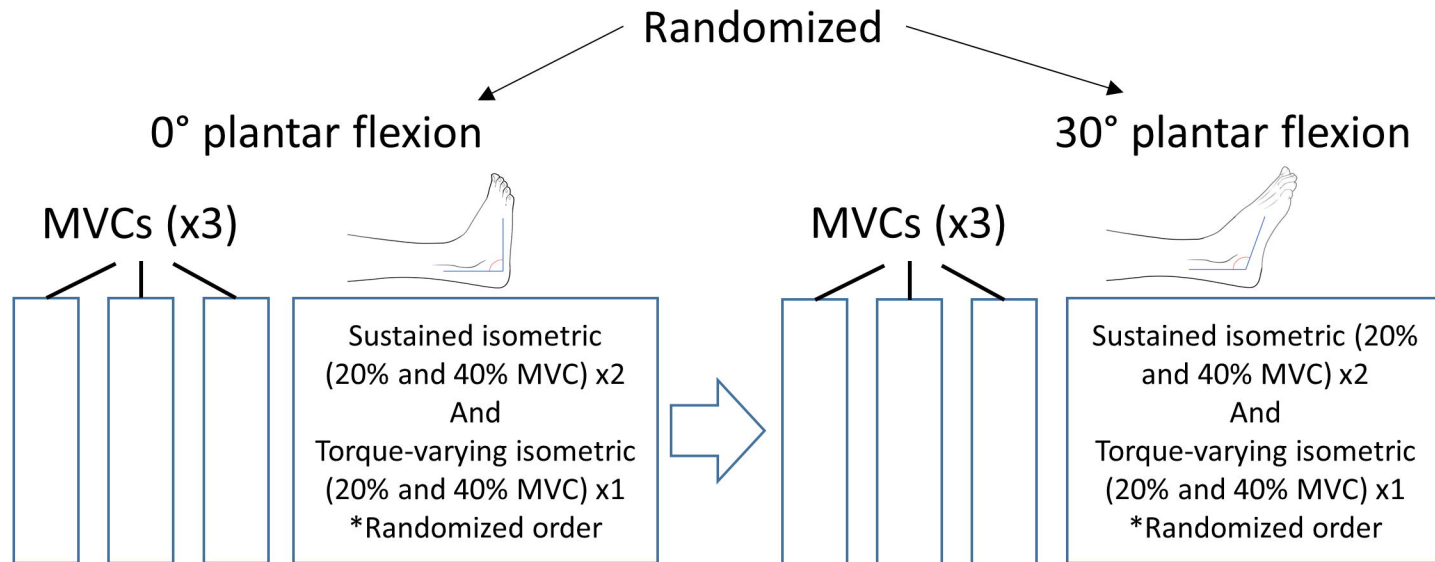

A)

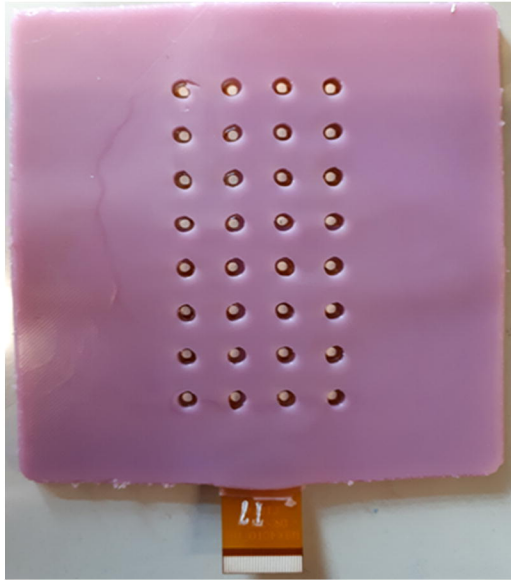

B)

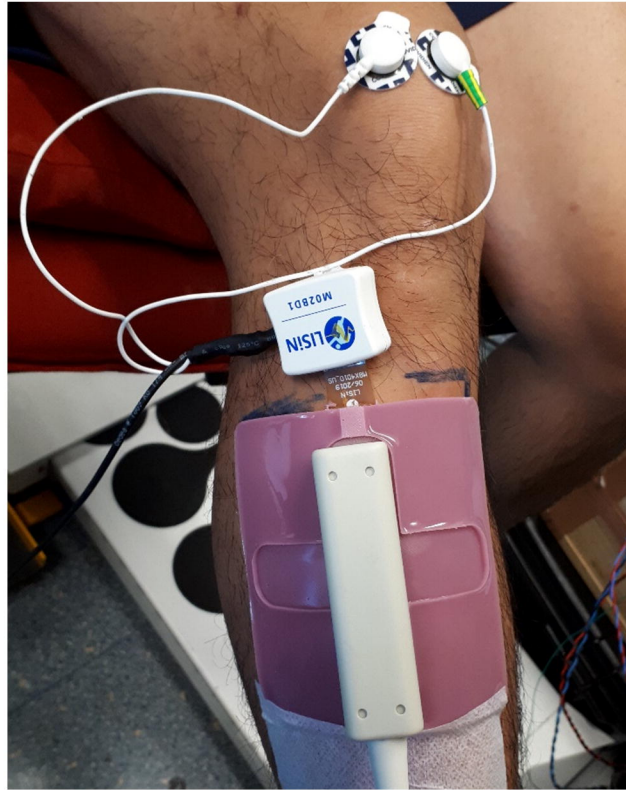

Distal

Proximal

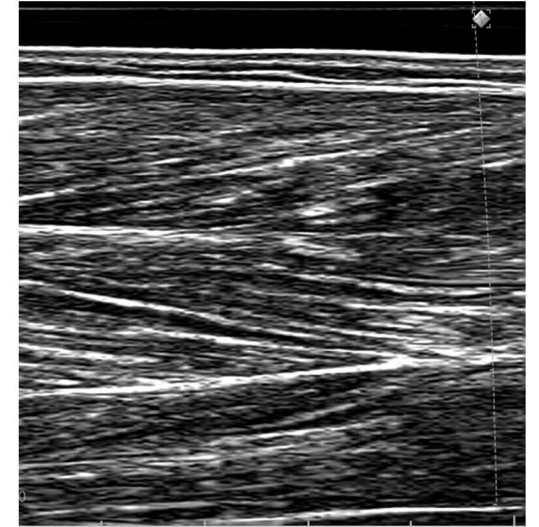

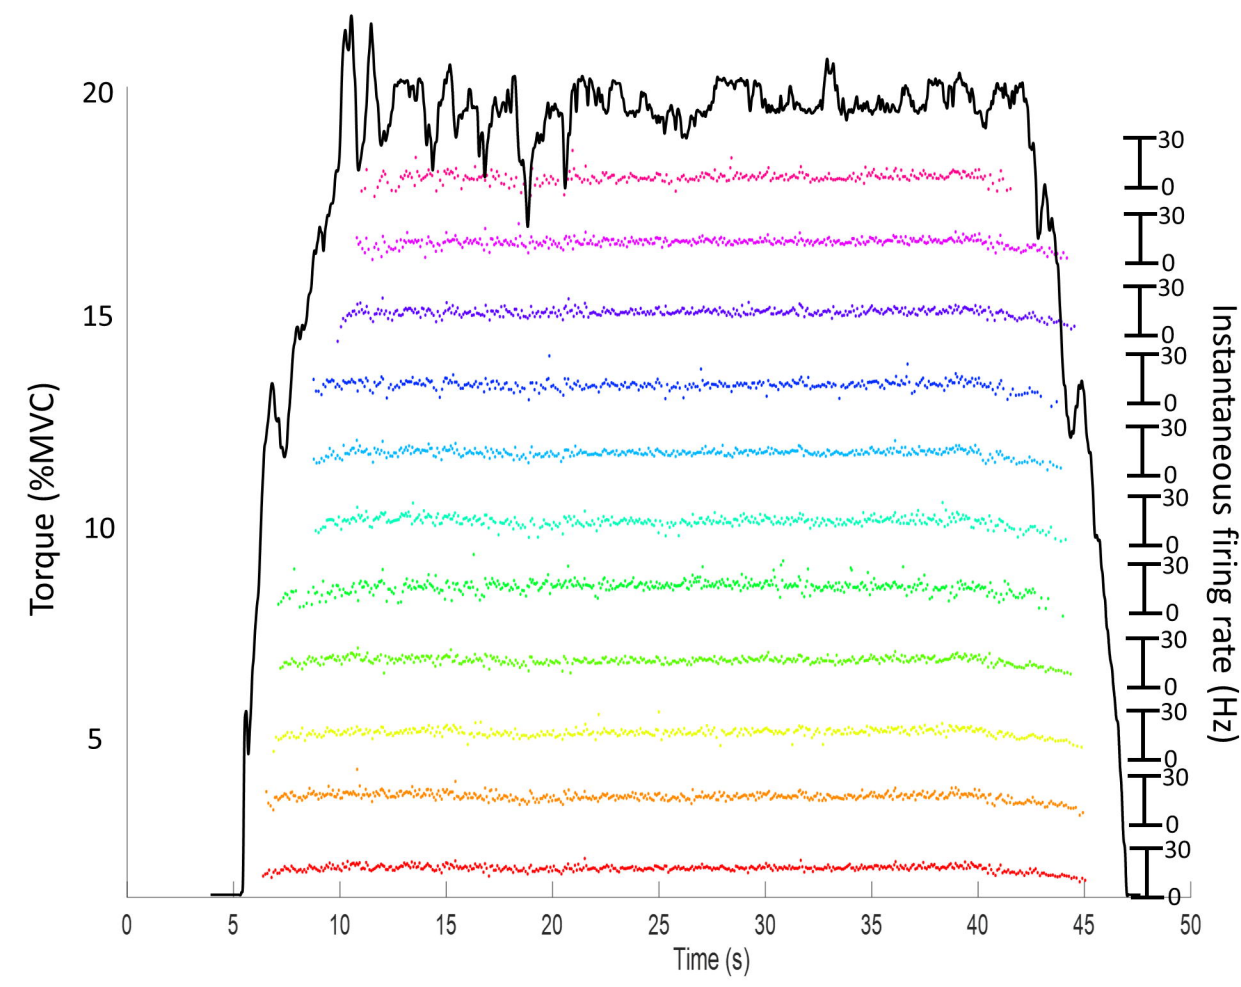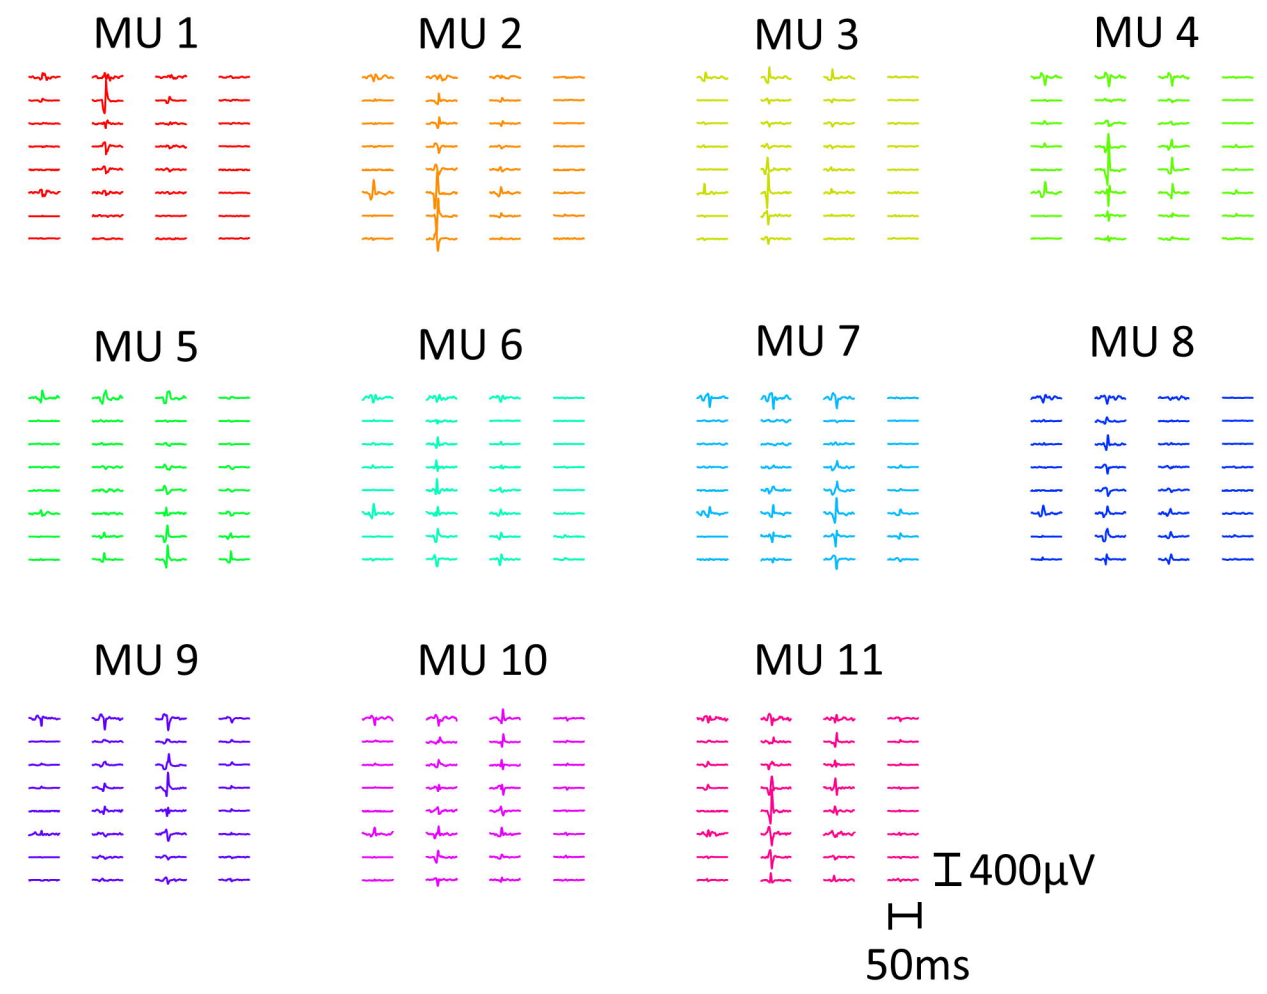

**Cross correlation = 0.90**

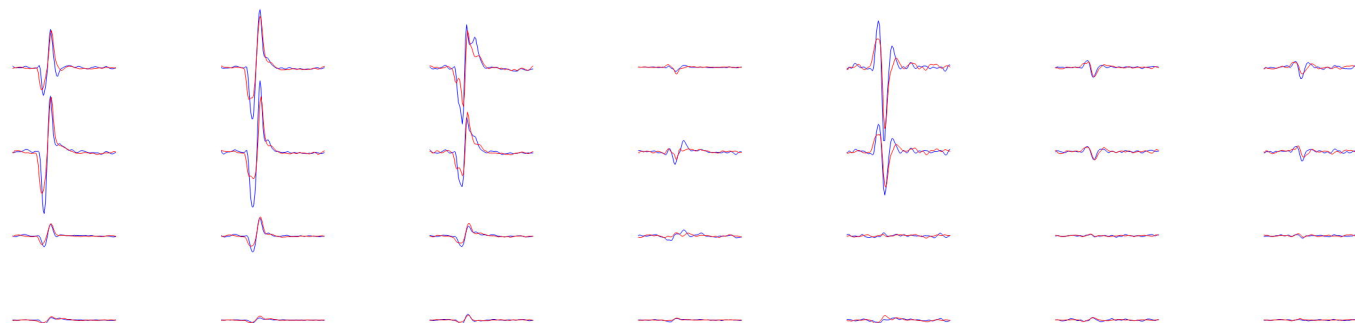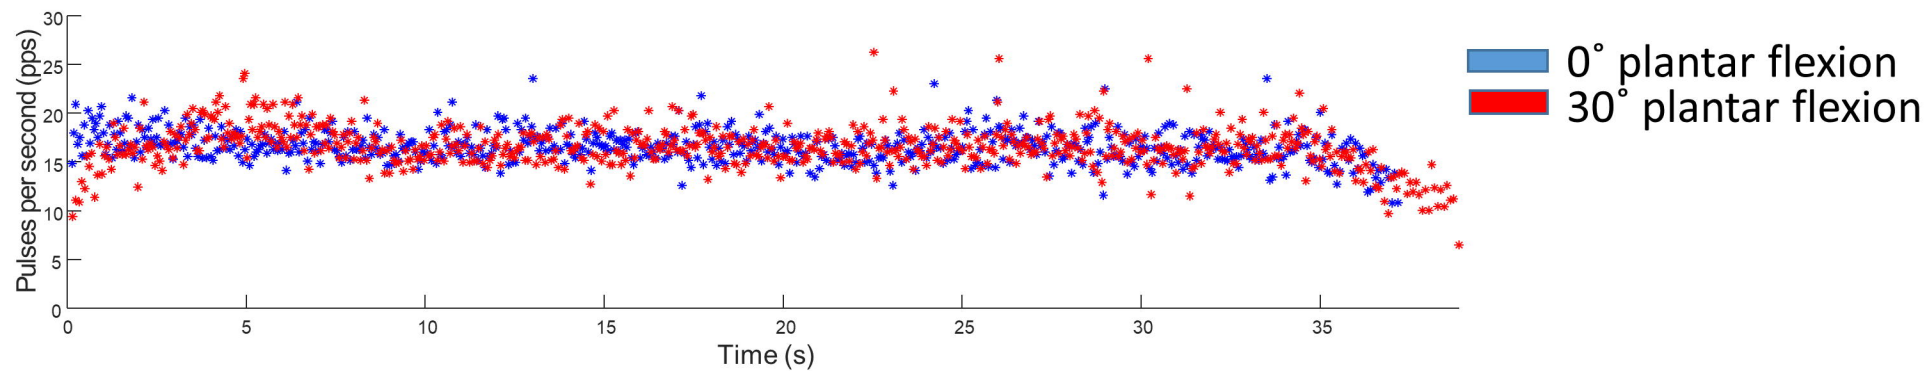

A)

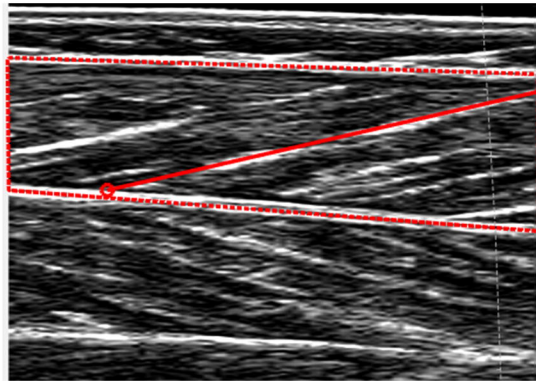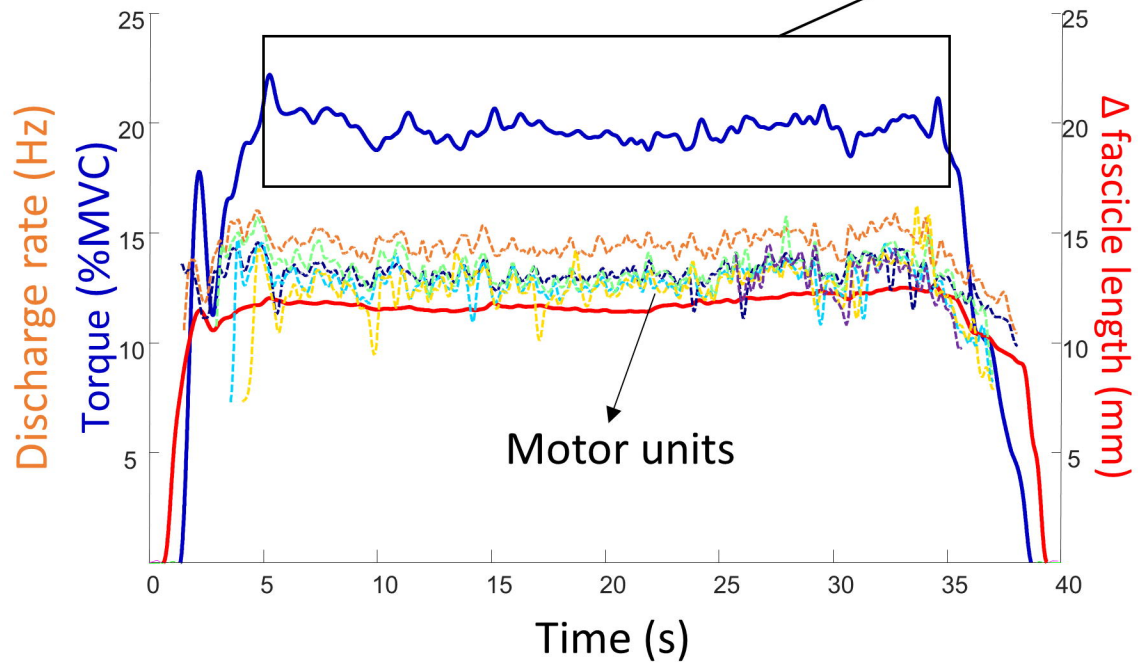

B)

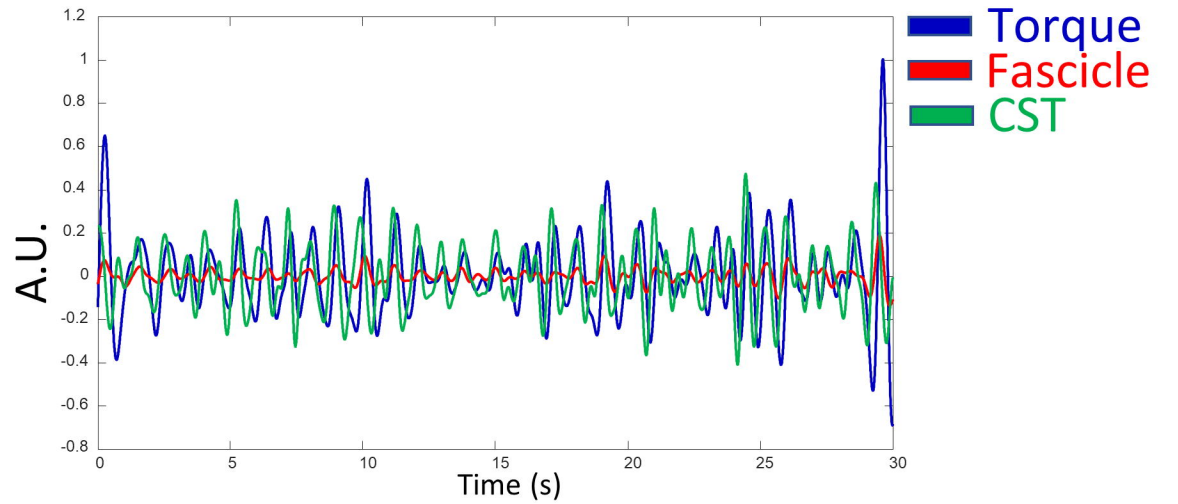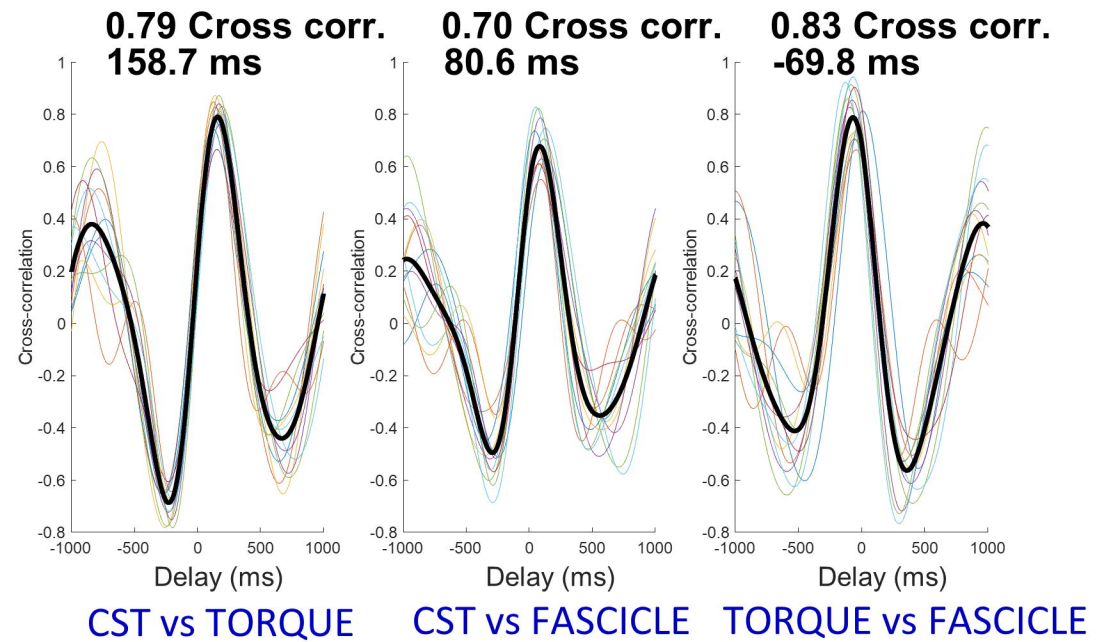

**A) lags steady contraction 20% MVC**

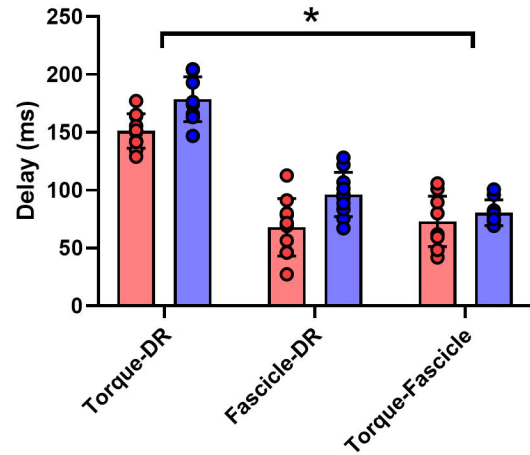

**Lags steady contraction 40% MVC**

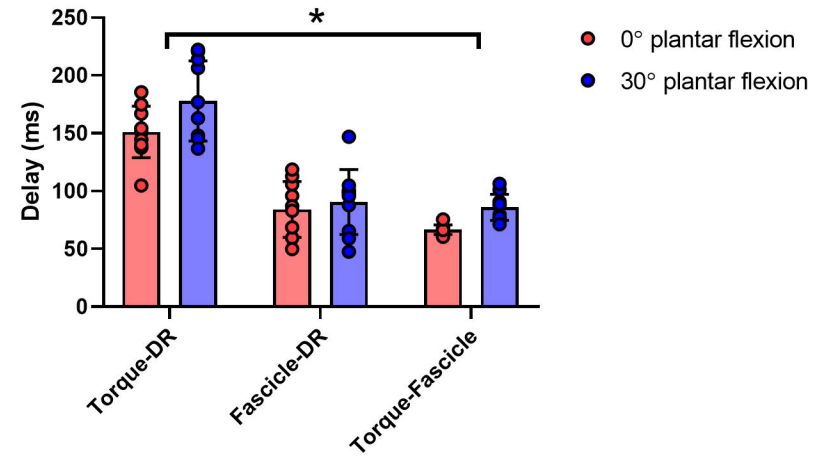

**B) Lags sinusoidal contraction 20% MVC**

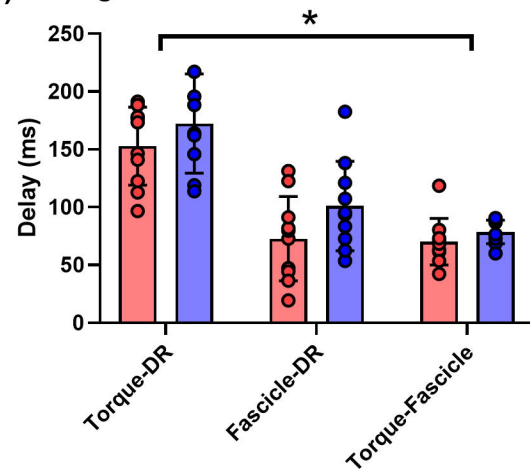

**Lags sinusoidal contraction 40% MVC**

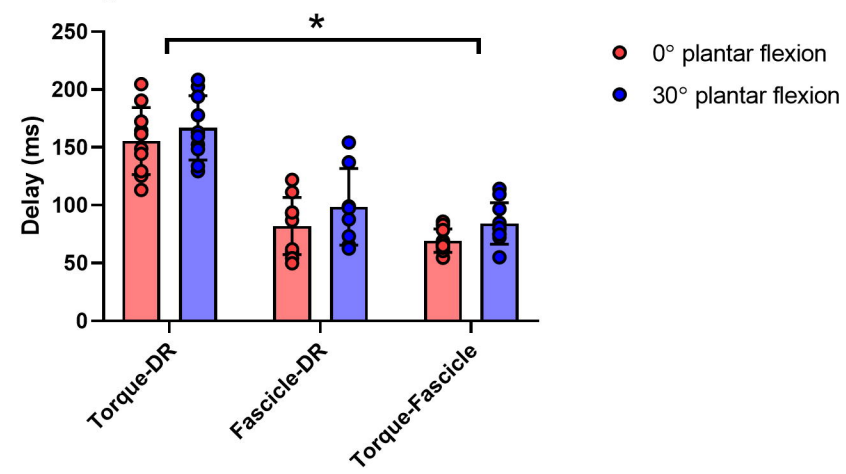

A)

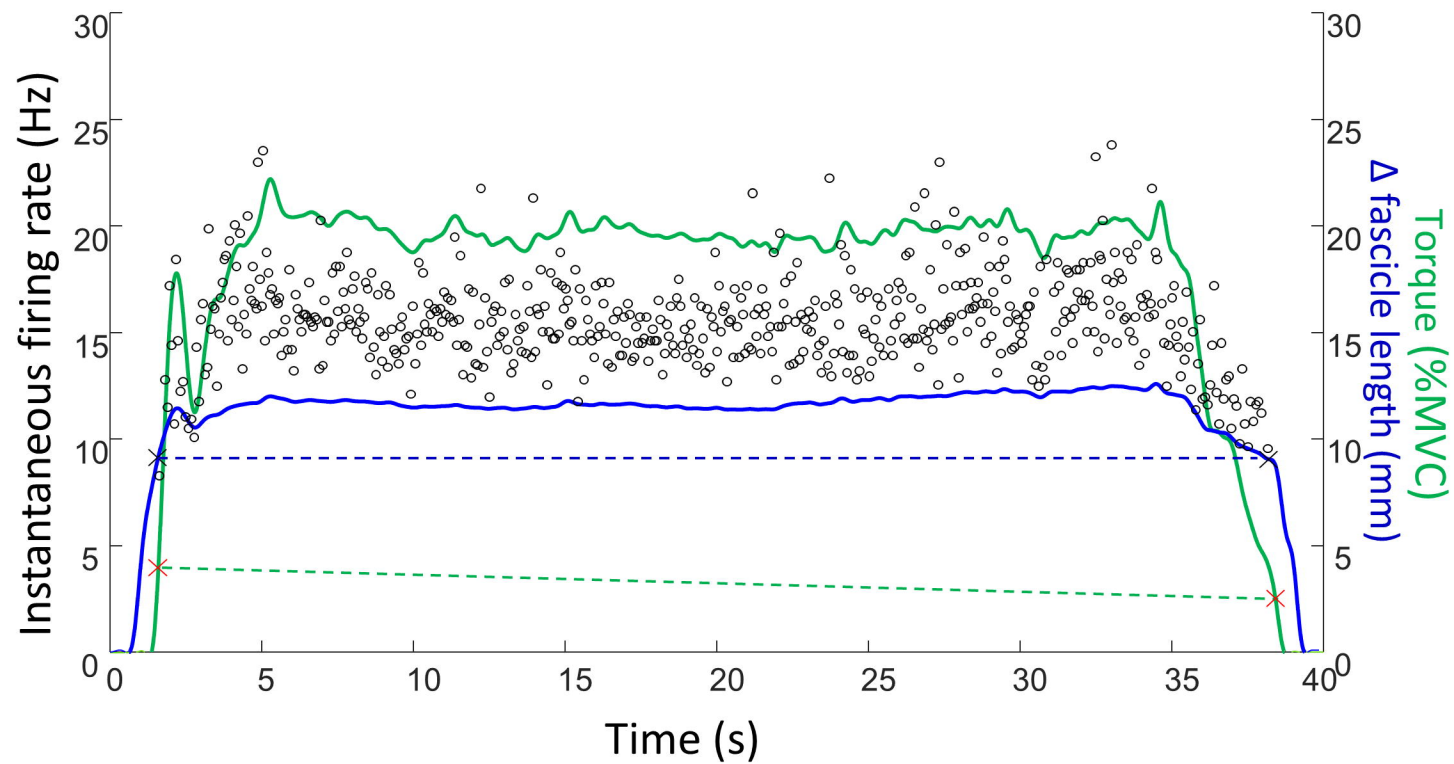

B)

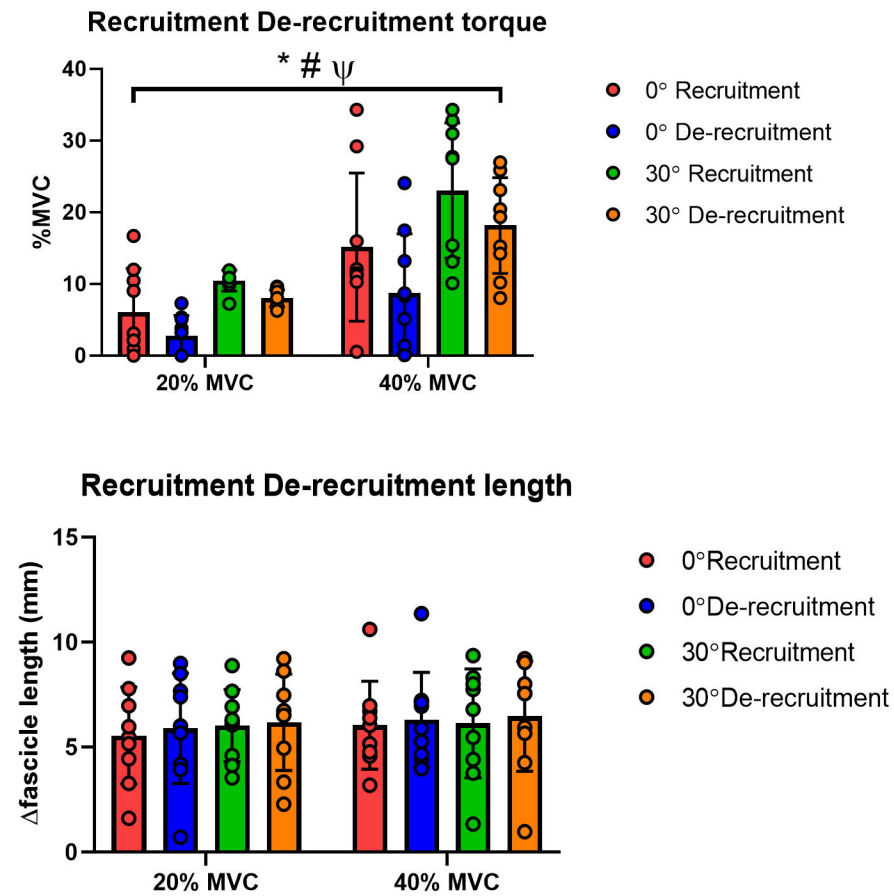

Source: https://www.biorxiv.org/content/10.1101/2021.04.27.441619v2.full.pdf
